# Supplementary material for: Can the intake of antiparasitic secondary metabolites explain the low prevalence of hemoparasites among wild Psittaciformes?
Source: Springer Nature journal article supplement (doi:10.1186/s13071-018-2940-3), 2018-06-19

# Can the intake of anti-parasitic secondary metabolites explain the low prevalence of hemoparasites among wild Psittaciformes?

Juan F. Masello, Javier Martínez, Luciano Calderón, Michael Wink, Petra Quillfeldt, Virginia Sanz, Jörn Theuerkauf, Luis Ortiz-Catedral, Igor Berkunsky, Dianne Brunton, José A. Díaz-Luque, Mark E. Hauber, Valeria Ojeda, Antoine Barnaud, Laura Casalins, Bethany Jackson, Alfredo Mijares, Romel Rosales, Gláucia Seixas, Patricia Serafini, Adriana Silva-Iturriza, Elenise Sipinski, Rodrigo A. Vásquez, Peter Widmann, Indira Widmann, Santiago Merino

Figure S1. Locations of the sampled population at Rasa I., Palawan, Philippines, in the Indo-Malayan zoogeographical region. Localities are numbered as in Table 1

Figure S2. Locations of the sampled populations in New Caledonia, Australasian zoogeographical region. Localities are numbered as in Table 1

Figure S3. Locations of the sampled population in the Chatham Is., Australasian zoogeographical region. Localities are numbered as in Table 1

Figure S4. Locations of the sampled populations in New Zealand, Australasian zoogeographical region. Localities are numbered as in Table 1

Figure S5. Locations of the sampled populations in the Neotropical zoogeographical region. Localities are numbered as in Table 1

*Fig. S1. Indo-Malayan region*

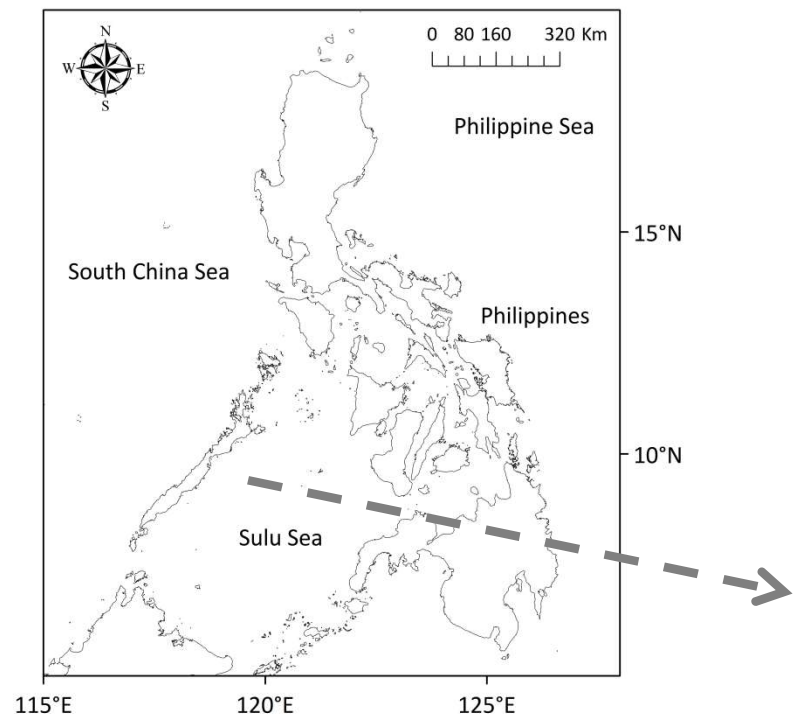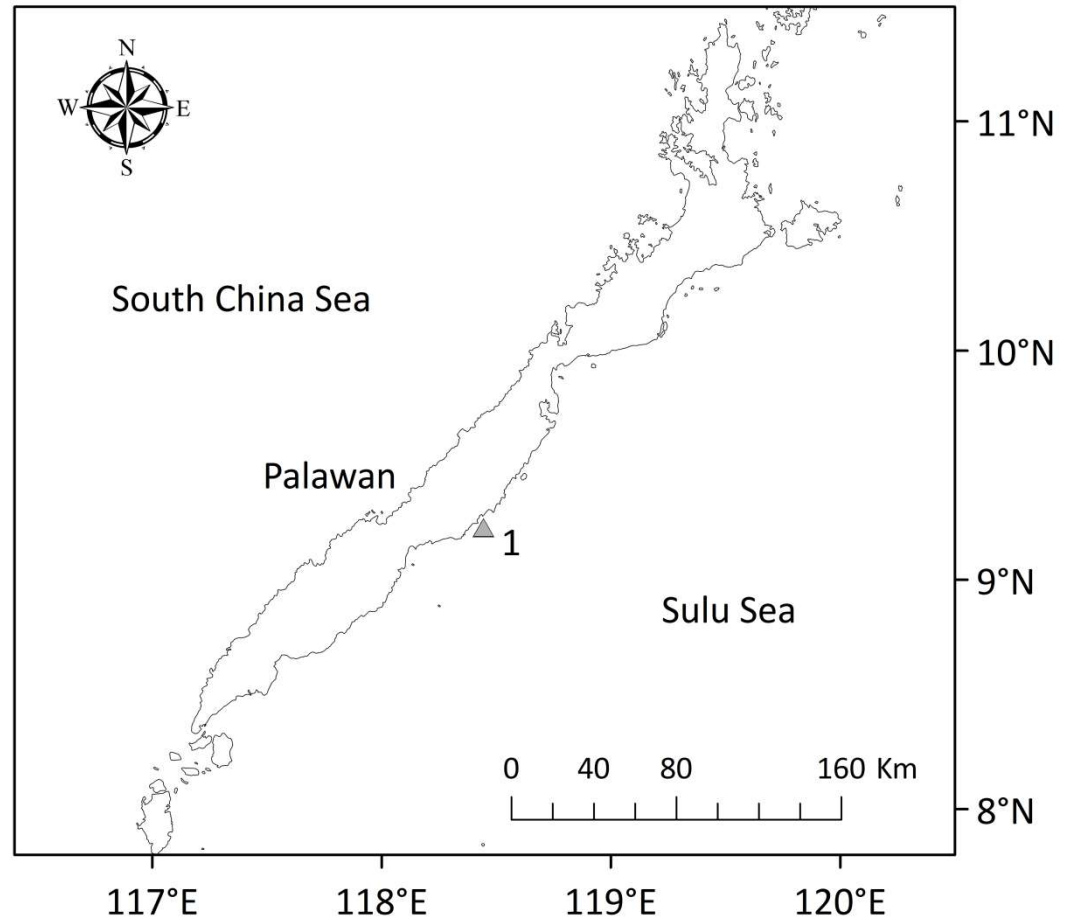

1: Rasa I., Palawan, Philippines

Fig. S2. Australasian region: New Caledonia

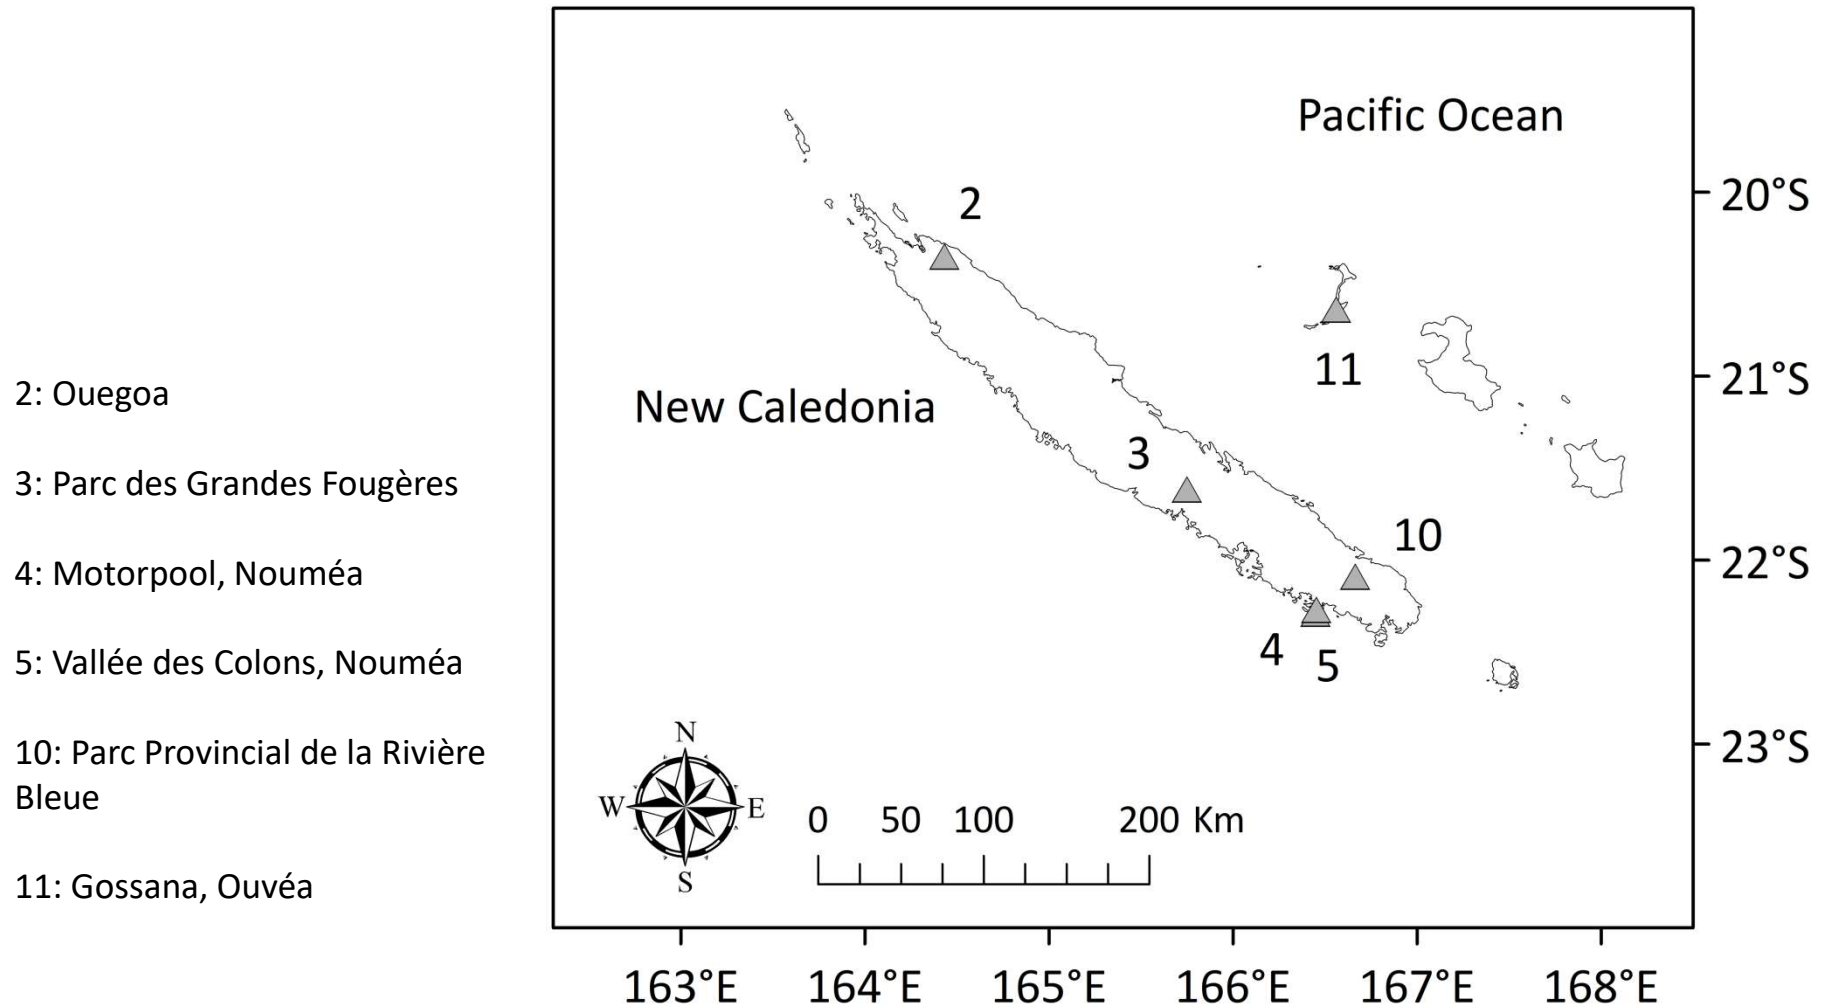

Fig. S3. Australasian region: Chatham Is., New Zealand

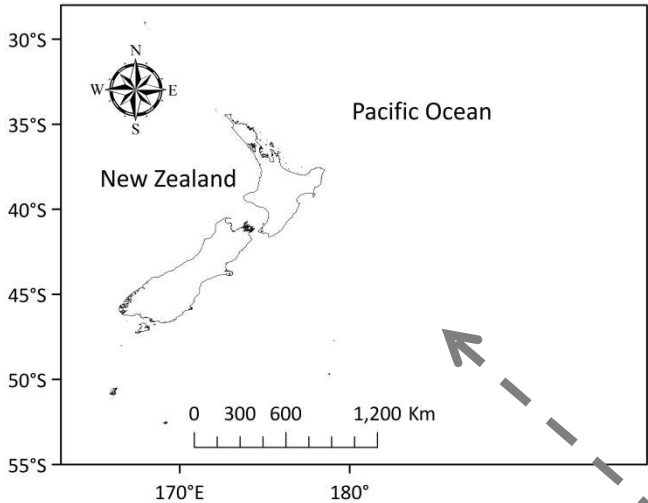

6: Mangere I.

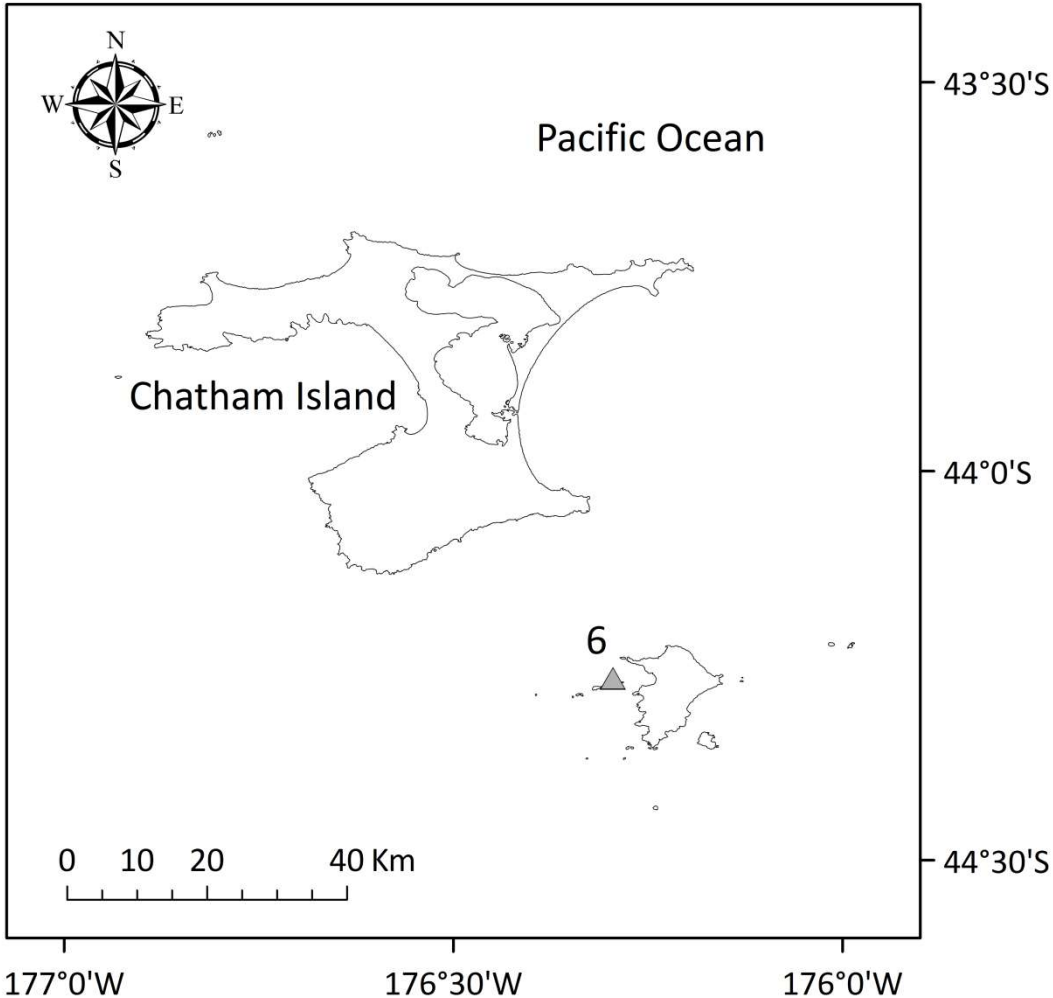

Fig. S4. Australasian region: New Zealand

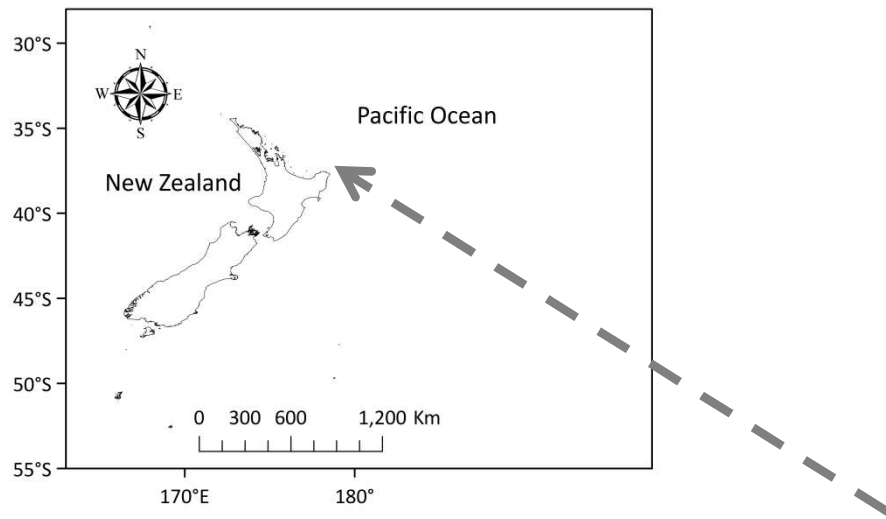

- 7: Raoul I.
- 8: Tiritiri Matangi I.
- 9: Little Barrier I.

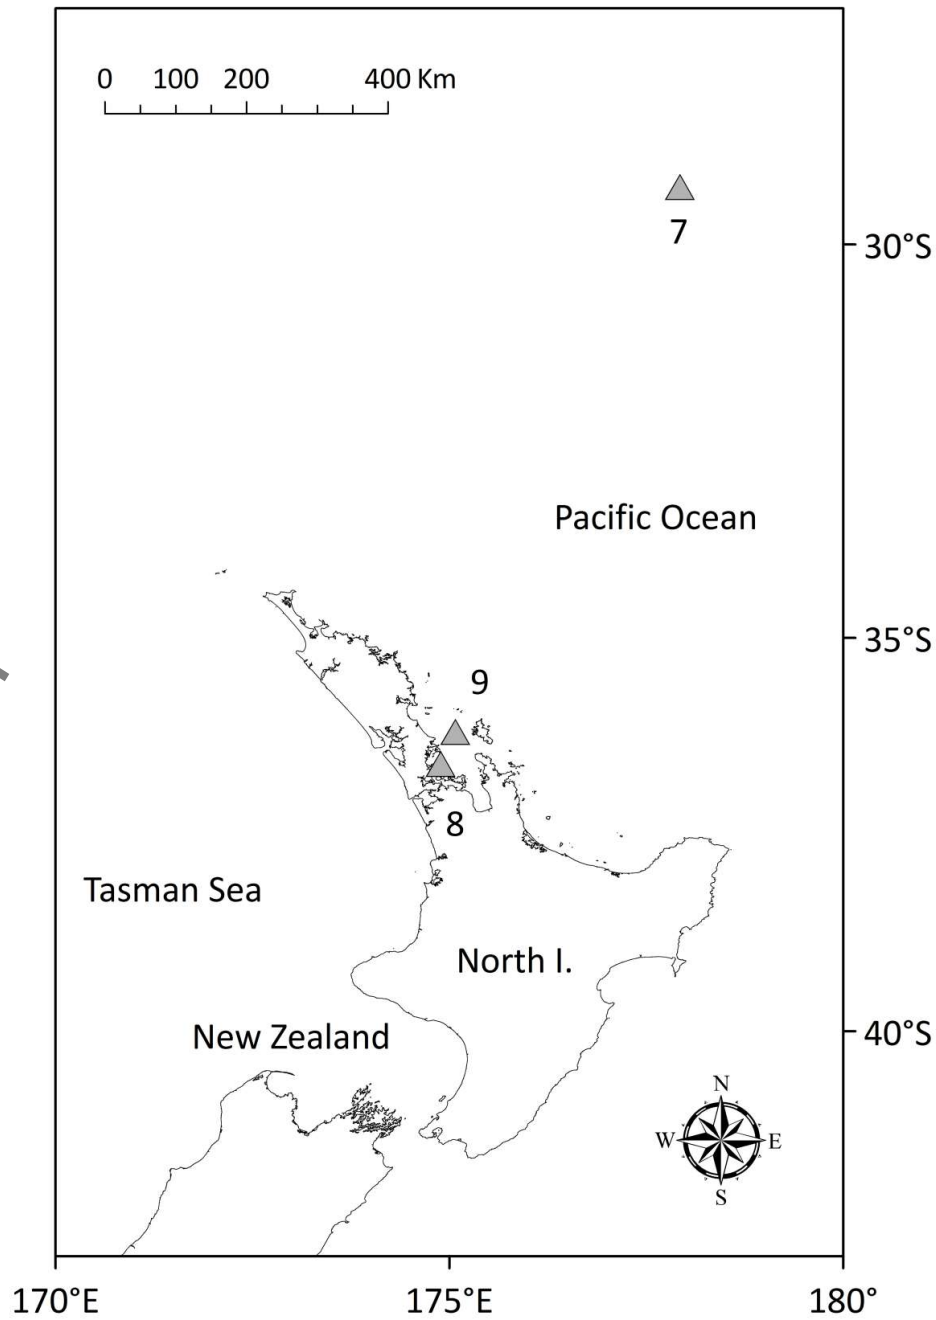

*Fig. S5. Neotropical region*

- 12: Trinidad, Bolivia
- 13: Sachojere, Bolivia
- 14: Beni, Bolivia
- 15: Chaco, Argentina
- 16: Isla Margarita, Venezuela
- 17: Principe Negro, Pantanal, Brazil
- 18: El Cóndor, Patagonia, Argentina
- 19: Comallo, Patagonia, Argentina
- 20: Isla Navarino, Chile
- 21: Bariloche, Patagonia, Argentina
- 22: Ilha Rasa, Guaraqueçaba, Brazil
- 23: Ilha das Gamelas, Guaraqueçaba, Brazil
- 24: Jujuy, Argentina
- 25: Pantanal, Brasil

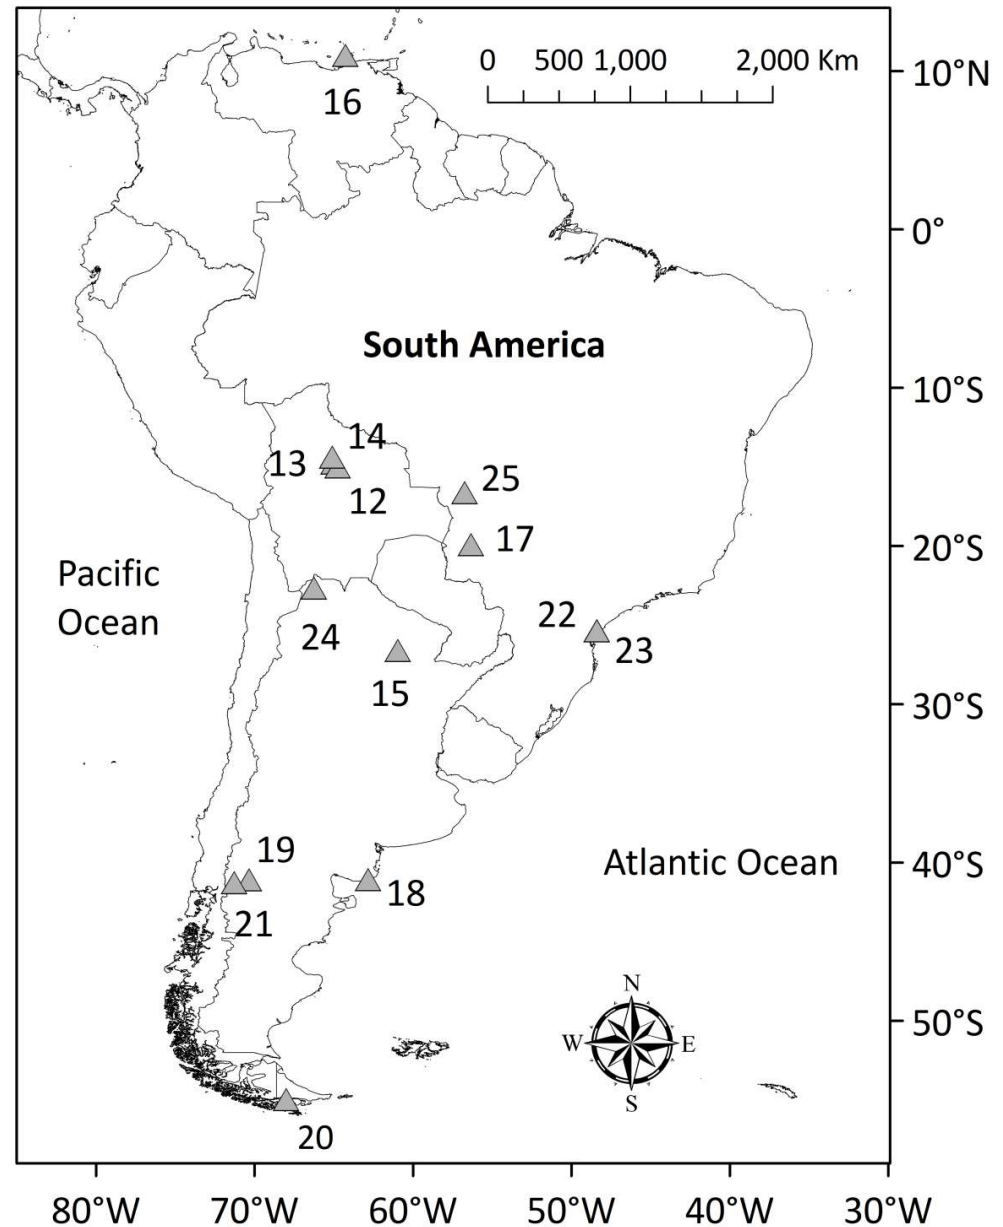

Supplement: 13071_2018_2940_MOESM2_ESM.pdf [file 13071_2018_2940_MOESM2_ESM.pdf]
